# Supplementary material for: Public perceptions, individual characteristics, and preventive behaviors for COVID-19 in six countries: a cross-sectional study
Source: Springer Nature journal article supplement (doi:10.1186/s12199-021-00952-2), 2021-03-03
Supplement: MOESM1 [file 18925648]

currently using.

This study was cleared by the ethics committee of the University of Exeter. Should you have any question, difficulty, or complaint, please contact Prof. Julian Jamison at [J.Jamison@exeter.ac.uk](mailto:J.Jamison@exeter.ac.uk).

By clicking on “Yes, I would like to participate in the survey” you give your consent to take part in the study and the survey will be launched.

- Yes, I would like to participate in the survey
- No, I would not like to participate in the survey

### Socio-demographics

How old are you?

- Below 18
- Between 18 and 25
- Between 26 and 35
- Between 36 and 45
- Between 46 and 55
- Between 56 and 65
- Between 66 and 75
- Above 75
- Prefer not to answer

What is your gender?

Male

Female

Prefer not to answer

What is your race (select all that apply)?

- American Indian or Alaskan Native
- Asian
- Black or African American
- Native Hawaiian or Other Pacific Islander
- White / Caucasian
- Prefer not to answer

What state do you live in?

Select state

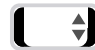

What is your work situation

- Self-employed
- Employed part-time
- Employed full-time
- Not in employment

In what range is the gross annual income of your household?

- \$23,000 or less
- \$23,001 - \$42,000
- \$42,001 - \$66,000
- \$66,001 - \$106,000
- \$106,001 or more
- Prefer not to answer

**These page timer metrics will not be displayed to the recipient.**

First Click: 0 seconds

Last Click: 0 seconds  
Page Submit: 0 seconds  
Click Count: 0 clicks

### General health status and risk factors

Some of the next questions are denoted by an “\*” to indicate that they ask information that may be more personal in nature and will be kept confidential.

Do you have any of the following conditions? (select all that apply)\*

- Diabetes
- High blood pressure / hypertension
- Heart disease
- Asthma or other chronic respiratory issues
- Allergies
- Other chronic illnesses that require long term care from a doctor (please specify)
- None of the above

Are you vaccinated against influenza this season?

Yes

No

Are you a smoker?

Yes

No

Have you in the past two weeks experienced any of the following symptoms?

\*

- Dry cough
- Fever
- Tiredness
- Runny nose
- Sore throat
- Nasal congestion
- Aches and pains
- Diarrhea
- Loss of smell or taste
- Any other symptoms
- None of the above

**These page timer metrics will not be displayed to the recipient.**

First Click: *0 seconds*

Last Click: *0 seconds*

Page Submit: *0 seconds*

Click Count: *0 clicks*

When did you first experience any symptom?\*

|                | Month                | Day                  | Year                              |
|----------------|----------------------|----------------------|-----------------------------------|
| Please Select: | <input type="text"/> | <input type="text"/> | <input type="text" value="2020"/> |

Have you been in contact with your doctor or the health authorities?

- Yes, and they said that getting tested for Covid-19 at this stage is not necessary
- Yes, and I am waiting to be tested

- No, I don't think my symptoms are serious enough to require medical attention
- Other

### Exposure -- Part 1

How many people that you have interacted with recently have been diagnosed with Covid 19?

On a typical working day (before the outbreak of Covid-19), with how many people would you have close social contact with (at less than 1 metre distance) and how long would you interact with them? (indicate approximate numbers - leave blank if the answer is zero)

|                          | Children (18 or younger) | Adults (between 19 and 60) | Adults (older than 60) |
|--------------------------|--------------------------|----------------------------|------------------------|
| For less than 15 minutes | <input type="text"/>     | <input type="text"/>       | <input type="text"/>   |
| For more than 15 minutes | <input type="text"/>     | <input type="text"/>       | <input type="text"/>   |

What is your profession?

Industry

Profession

In what type of area are you currently living?

- Urban area
- Semi-urban / residential
- Countryside

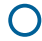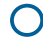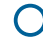

My current home is best described as

- House
- Apartment
- Condominium
- Trailer
- Shelter
- Other (please specify)

Who shares the kitchen or other facilities in your accommodation? Please indicate the number of people who are:

leave blank if 0

Under the age of 2

Between the age of 2 and 12

Between the age of 13 and 18

Between the age of 19 and 25

Between the age of 26 and 50

Between the age of 50 and 65

Above 65

Which of the following best describes your current living situation?

- Live alone in my home (may have a pet)

- Live in a household with other people
- Live in a facility such as a nursing home which provides meals and 24-hour nursing care
- Temporarily staying with a relative or friend
- Temporarily staying in a shelter or homeless

What outside space do you have access to in your current accommodation?  
(select all that apply)

- None
- Balcony
- Terrace
- Small private garden or Yard (less than 200 sq ft)
- Large private garden or Yard (more than 200 sq ft)
- Common courtyard
- Other

**These page timer metrics will not be displayed to the recipient.**

First Click: *0 seconds*

Last Click: *0 seconds*

Page Submit: *0 seconds*

Click Count: *0 clicks*

## Exposure -- Part 2

In normal times (before the outbreak of Covid 19), how often would you use the following means of transportation over the course of two weeks?

|     | Never                 | Once                  | Twice                 | More than twice       |
|-----|-----------------------|-----------------------|-----------------------|-----------------------|
| Car | <input type="radio"/> | <input type="radio"/> | <input type="radio"/> | <input type="radio"/> |

|                                                                 |                       |                       |                       |                       |
|-----------------------------------------------------------------|-----------------------|-----------------------|-----------------------|-----------------------|
| Bus / metro / tram<br>/ train (< 2 hours)<br>outside rush hours | <input type="radio"/> | <input type="radio"/> | <input type="radio"/> | <input type="radio"/> |
| Bus / metro / tram<br>/ train (< 2 hours)<br>during rush hours  | <input type="radio"/> | <input type="radio"/> | <input type="radio"/> | <input type="radio"/> |
| Long journey<br>coach / train (> 2<br>hours)                    | <input type="radio"/> | <input type="radio"/> | <input type="radio"/> | <input type="radio"/> |
| Plane                                                           | <input type="radio"/> | <input type="radio"/> | <input type="radio"/> | <input type="radio"/> |

Have you travelled abroad or outside your local area since January 2020?

Yes

No

Please indicate if you have been in any of the following areas (select all that apply):

- Wuhan
- Other regions in China
- North of Italy (Lombardia, Veneto, Emilia Romagna)
- Other regions in Italy
- Other region/country (please indicate)

If you have stayed outside your home, have you stayed in facilities which have shared facilities with other people (such as hotels, ski resorts, cruiseships)?

Yes

No



## Behavioral response

Due to the Covid-19 epidemic, have you changed any of your daily behaviors?

Yes

No

What caused your behavior to change (select all that apply)?

- To protect myself
- To protect my family
- To protect the public (people I don't know)
- Because everyone else did
- Due to recommendations from friends/family
- Due to recommendations from doctors or public health officials
- Due to recommendations from politicians
- Contact with people infected with Covid-19
- Appearance of Covid-19-related symptoms
- Diagnosis of Covid-19
- Legal measures (e.g. a stay at home order)
- Other (please specify)

For each of the following behaviors, how often do you engaged in them since the Covid 19 outbreak first started spreading in your country?

Never      Rarely      Sometimes      Very often      Always

Keeping at least 4  
ft distance from  
anyone who is  
coughing or  
sneezing

Avoiding touching eyes, nose and mouth

Covering your mouth and nose with your bent elbow or tissue when you cough or sneeze. Then dispose of the used tissue immediately

If you have fever, cough and difficulty breathing, seek medical care early

For each of the following behaviors, please tell us how often you engaged in them at different times

|                                                            | In normal times (before the outbreak of Covid-19) | Soon after the Covid 19 outbreak started in your country | Now                   |
|------------------------------------------------------------|---------------------------------------------------|----------------------------------------------------------|-----------------------|
| Wash your hands with water and soap, or use hand sanitizer | <input type="text"/>                              | Same as in "normal times"                                | Same as in "since out |
| Wear a mask                                                | <input type="text"/>                              | Same as in "normal times"                                | Same as in "since out |
| Eat at least 5 portions of fruit and vegetables a day      | <input type="text"/>                              | Same as in "normal times"                                | Same as in "since out |
| Exercise                                                   | <input type="text"/>                              | Same as in "normal times"                                | Same as in "since out |

|                                                                                                   |                      |                           |                       |
|---------------------------------------------------------------------------------------------------|----------------------|---------------------------|-----------------------|
| Meet friends/family through video chat                                                            | <input type="text"/> | Same as in "normal times" | Same as in "since out |
| Smoke                                                                                             | <input type="text"/> | Same as in "normal times" | Same as in "since out |
| Take vitamins or supplements                                                                      | <input type="text"/> | Same as in "normal times" | Same as in "since out |
| Participate in a social gathering with more than 20 people                                        | <input type="text"/> | Same as in "normal times" | Same as in "since out |
| Go to a large closed space such as a museum, shopping malls or supermarkets                       | <input type="text"/> | Same as in "normal times" | Same as in "since out |
| Go to a large open space such as a public park                                                    | <input type="text"/> | Same as in "normal times" | Same as in "since out |
| Run errands such as filling petrol, going to the bank or post office, buying items in small shops | <input type="text"/> | Same as in "normal times" | Same as in "since out |
| Visit family or friends                                                                           | <input type="text"/> | Same as in "normal times" | Same as in "since out |
| Attend a GP practice                                                                              | <input type="text"/> | Same as in "normal times" | Same as in "since out |
| Use public transport                                                                              | <input type="text"/> | Same as in "normal times" | Same as in "since out |

Order meal  
deliveries

Same as in "normal times"

Same as in "since out

**These page timer metrics will not be displayed to the recipient.**

First Click: 0 seconds

Last Click: 0 seconds

Page Submit: 0 seconds

Click Count: 0 clicks

How did your work situation change in the recent weeks as a consequence of the pandemic?

I do not work  
anymore

I started  
teleworking

No change

Other

Not applicable

Have you moved accommodation or location as a consequence of the epidemic?

Yes

No

In what type of area are you currently living?

Urban area

Semi-urban / residential

Countryside

On a typical day in the last 2 weeks, how many close contacts (less than 4 ft distance) have you had and with whom? (indicate approximate numbers - leave blank if the answer is zero)

|                          | Children (18 or younger) | Adults (between 19 and 60) | Adults (older than 60) |
|--------------------------|--------------------------|----------------------------|------------------------|
| For less than 15 minutes | <input type="text"/>     | <input type="text"/>       | <input type="text"/>   |
| For more than 15 minutes | <input type="text"/>     | <input type="text"/>       | <input type="text"/>   |

Over the past two weeks, to what extent have you managed to reduce in person interactions in your work context?

- Not at all     
  Partly     
  To a large extent     
  Completely     
  Not applicable

With what weekly frequency have you done any of the following activities since the Covid 19 outbreak in your country?

|                                                                                                                      | Not at all            | At least once         | Almost every day      | Every day             |
|----------------------------------------------------------------------------------------------------------------------|-----------------------|-----------------------|-----------------------|-----------------------|
| Bought groceries or medicines for friends or family in quarantine                                                    | <input type="radio"/> | <input type="radio"/> | <input type="radio"/> | <input type="radio"/> |
| Bought groceries or medicines for friends or family members in critical risk groups (e.g. elderly immunocompromised) | <input type="radio"/> | <input type="radio"/> | <input type="radio"/> | <input type="radio"/> |
| Other volunteer activities                                                                                           | <input type="radio"/> | <input type="radio"/> | <input type="radio"/> | <input type="radio"/> |
| Attended religious services                                                                                          | <input type="radio"/> | <input type="radio"/> | <input type="radio"/> | <input type="radio"/> |

Have you had to defer needed health care because of the Covid 19 outbreak and related measures?

Yes

No

Was the deferred care for:

- Routine preventive services
- Ongoing care for a continuing health problem
- Care for a newly developed problem

How concerned are you that the deferred care is going to harm your health?

Extremely concerned

Very concerned

Somewhat concerned

Slightly concerned

Not at all concerned

Have you ever used telemedicine for healthcare?

Yes

No

Would you consider using telemedicine for your deferred healthcare?

Yes

No

### Individual economic and mental consequences of the virus

How well can you work from home relative to your normal work situation?

Not at all

Not well

Somewhat well

Quite well

Essentially unaffected

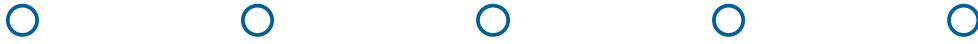

Have you lost your job or has your activity (as self-employed) been stopped as a consequence of the Covid-19 pandemic?

Yes, permanently

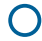

Yes, temporarily

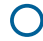

No

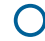

How has your workload changed as a consequence of the Covid 19 pandemic?

I work more hours

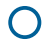

I work the same number of hours as before

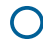

I work less hours

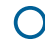

Have you experienced a fall in household income as a consequence of the Covid-19 pandemic?

Yes

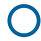

No

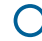

How much did your gross household income fall in the first trimester of 2020? (provide estimate in USD)

Do you expect substantial loss in the labor income of your household (including self-employment income) as a consequence of the Covid 19 pandemic for the six months from April to September of 2020?

Yes

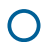

No

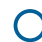

How much do you expect

provide estimate in USD

Your own gross labor income to fall in the next six months?

Your gross household income to fall in the next six months?

Do you currently have a mortgage on your house?

Yes

No

How did your weekly expenses change relative to the month of January?

- Drop of more than 10%
- Drop of less than 10%
- No change
- Increase of less than 10%
- Increase of more than 10%

How did your savings change relative to the month of January?

- Drop of more than 10%
- Drop of less than 10%
- No change
- Increase of less than 10%
- Increase of more than 10%



## Beliefs and preferences for interventions

If restrictions to stop the pandemic are currently in place in your country, how bothered are you for not being able to do the following activities?

|                                                                               | Not at all<br>bothered | Slightly<br>bothered  | Moderately<br>bothered | Very<br>bothered      | Extreme<br>bothered   |
|-------------------------------------------------------------------------------|------------------------|-----------------------|------------------------|-----------------------|-----------------------|
| Working at your usual workplace                                               | <input type="radio"/>  | <input type="radio"/> | <input type="radio"/>  | <input type="radio"/> | <input type="radio"/> |
| Meeting other people in your leisure time                                     | <input type="radio"/>  | <input type="radio"/> | <input type="radio"/>  | <input type="radio"/> | <input type="radio"/> |
| Engage in leisure activities outside your home (e.g. sport, restaurants, ...) | <input type="radio"/>  | <input type="radio"/> | <input type="radio"/>  | <input type="radio"/> | <input type="radio"/> |
| Go into non-essential shops                                                   | <input type="radio"/>  | <input type="radio"/> | <input type="radio"/>  | <input type="radio"/> | <input type="radio"/> |
| Travelling for work                                                           | <input type="radio"/>  | <input type="radio"/> | <input type="radio"/>  | <input type="radio"/> | <input type="radio"/> |
| Travelling for leisure                                                        | <input type="radio"/>  | <input type="radio"/> | <input type="radio"/>  | <input type="radio"/> | <input type="radio"/> |
| Anything else<br><input type="text"/>                                         | <input type="radio"/>  | <input type="radio"/> | <input type="radio"/>  | <input type="radio"/> | <input type="radio"/> |

How effective do you believe each of these measures is in reducing the spread of the epidemic?

|                                | Not<br>effective<br>at all | Slightly<br>effective | Moderately<br>effective | Very<br>effective     | Extremely<br>effective |
|--------------------------------|----------------------------|-----------------------|-------------------------|-----------------------|------------------------|
| Shutting down schools          | <input type="radio"/>      | <input type="radio"/> | <input type="radio"/>   | <input type="radio"/> | <input type="radio"/>  |
| Shutting down public transport | <input type="radio"/>      | <input type="radio"/> | <input type="radio"/>   | <input type="radio"/> | <input type="radio"/>  |

|                                                                          |                       |                       |                       |                       |                       |
|--------------------------------------------------------------------------|-----------------------|-----------------------|-----------------------|-----------------------|-----------------------|
| Shutting down non-essential businesses                                   | <input type="radio"/> | <input type="radio"/> | <input type="radio"/> | <input type="radio"/> | <input type="radio"/> |
| Limiting mobility outside home                                           | <input type="radio"/> | <input type="radio"/> | <input type="radio"/> | <input type="radio"/> | <input type="radio"/> |
| Forbidding mass gatherings                                               | <input type="radio"/> | <input type="radio"/> | <input type="radio"/> | <input type="radio"/> | <input type="radio"/> |
| Introducing fines for citizens that don't respect public safety measures | <input type="radio"/> | <input type="radio"/> | <input type="radio"/> | <input type="radio"/> | <input type="radio"/> |
| Requiring masks to be worn outside by everyone                           | <input type="radio"/> | <input type="radio"/> | <input type="radio"/> | <input type="radio"/> | <input type="radio"/> |

How effective do you believe hand washing is in reducing the spread of the epidemic?

|                       |                       |                       |                       |                       |
|-----------------------|-----------------------|-----------------------|-----------------------|-----------------------|
| Not effective at all  | Slightly effective    | Moderately effective  | Very effective        | Extremely effective   |
| <input type="radio"/> | <input type="radio"/> | <input type="radio"/> | <input type="radio"/> | <input type="radio"/> |

What fraction of people in your local area do you think...?

Fraction in percentage points %

0 5 10 15 20 25 30 35 40 45 50 55 60 65 70 75 80 85 90 95 100

Are currently infected?

What do you think is the probability that...

Probability in percentage points %

0 5 10 15 20 25 30 35 40 45 50 55 60 65 70 75 80 85 90 95 100

You are or have  
been infected with  
Covid 19?

What do you think is the probability that an infected person...?

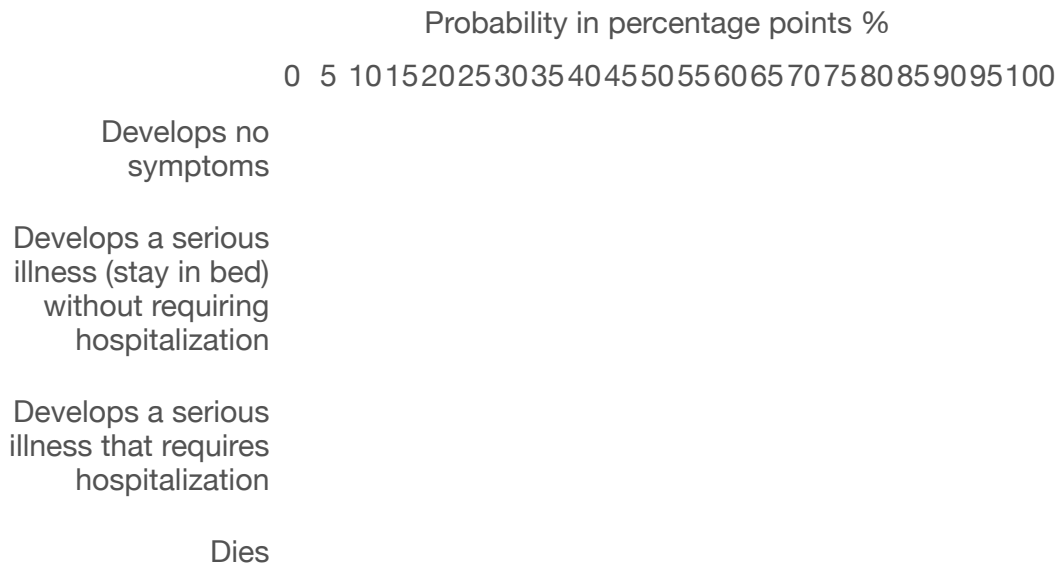

Have you experienced any positive non-financial effects from the societal changes occurring due to the epidemic, such as (select all that apply):

- Enjoying more free time
- Enjoying time with family
- Reduction of air pollution
- Reduction of noise pollution
- Other
- None of the above

Have you experienced any negative non-financial effects from the societal changes occurring due to the epidemic, such as (select all that apply):

- Boredom

- Loneliness
- Trouble sleeping
- General anxiety and stress
- Increased conflicts with friends, relatives and neighbours
- Other
- None of the above

How happy do you feel these days?

- Extremely unhappy   Moderately unhappy   Slightly unhappy   Neither happy nor unhappy   Slightly happy   Moderately happy   Extremely happy
- 

Do you agree with the current approach taken by your government in response to the pandemic?

- Strongly disagree   Somewhat disagree   Neither agree nor disagree   Somewhat agree   Strongly agree
- 

In comparison to a regular influenza epidemic you have experienced in the last 5 years and in the absence of any measures for Covid 19, do you think the health consequences (number of infected people and number deaths) of the Covid 19 epidemic would be?

- Much lower   Lower   About the same   Higher   Much higher
- 

**These page timer metrics will not be displayed to the recipient.**

First Click: 0 seconds

Last Click: 0 seconds

Page Submit: 0 seconds

Click Count: 0 clicks

Powered by Qualtrics
